# Supplementary material
Source: MDPI journal article supplement (https://www.mdpi.com/2073-4441/16/10/1449)
Supplement: s1 [file s1 › water-2976726-supplementary.pdf]

### Supplementary data

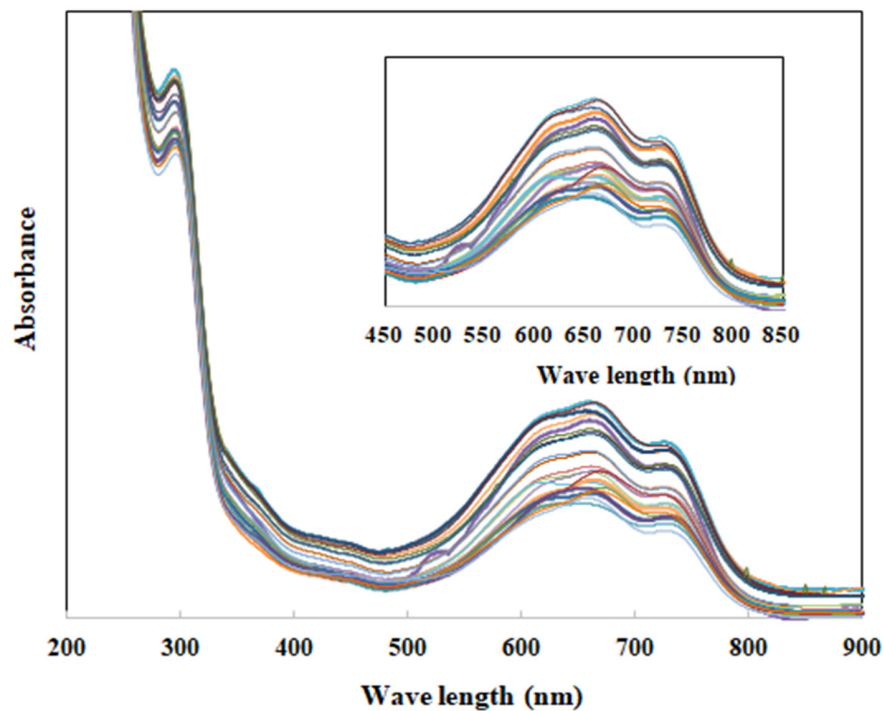

**Figure S1.** Change in UV spectra of CR solution during the kinetic adsorption by BPBC for the wave length 200-900 nm.

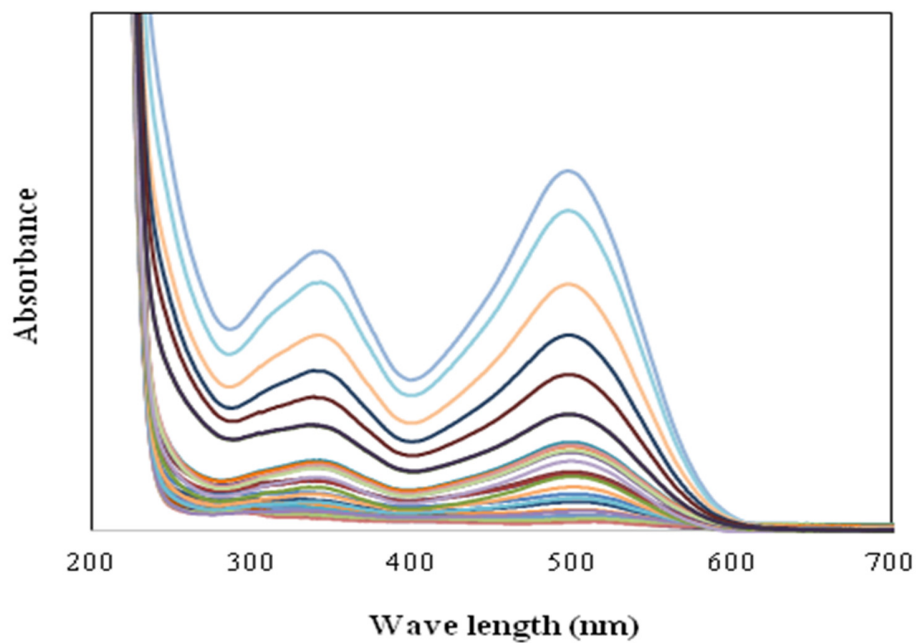

**Figure S2.** Changes in UV spectra of CR solution during the column adsorption by BPBC (3.6 cm bed depth) for the wave length 200-700 nm.
